# Supplementary material for: Inhibition of Aflatoxin Production by Citrinin and Non-Enzymatic Formation of a Novel Citrinin-Kojic Acid Adduct
Source: MDPI journal article supplement (doi:10.3390/jof9010029), 2022-12-23
Supplement: s1 [file s1]

## Supplement Materials

### Inhibition of Aflatoxin Production by Citrinin and Non-Enzymatic Formation of a Novel Citrinin-Kojic Acid Adduct

Ichinomiya, M.; Fukushima-Sakuno, E.; Kawamoto, A.; Nakagawa, H.; Hatabayashi, H.; Nakajima, H.; Yabe, K.

Figure S1. High-resolution (HR)-ESI-TOFMS spectrum of CTN-KA adduct (positive ion mode).

Figure S2. High-resolution (HR)-ESI-TOFMS spectrum of CTN-KA adduct (negative ion mode).

Figure S3.  $^{13}\text{C}$ -NMR spectrum of CTN-KA adduct (Acetone- $d_6$ ).

Figure S4.  $^1\text{H}$ -NMR spectrum of CTN-KA adduct (Acetone- $d_6$ ).

Figure S5. HMQC spectrum of CTN-KA adduct (Acetone- $d_6$ ).

Figure S6. HMBC spectrum of CTN-KA adduct (Acetone- $d_6$ ).

Figure S7. NOESY spectrum of CTN-KA adduct (Acetone- $d_6$ ).

## Single Mass Analysis

Tolerance = 5.0 PPM / DBE: min = -1.5, max = 50.0

Element prediction: Off

Number of isotope peaks used for i-FIT = 3

Monoisotopic Mass, Even Electron Ions

199 formula(e) evaluated with 2 results within limits (up to 50 best isotopic matches for each mass)

Elements Used:

C: 1-30 H: 1-40 N: 0-5 O: 1-10

120315004 38 (1.156)

1: TOF MS ES+

5.78e+003

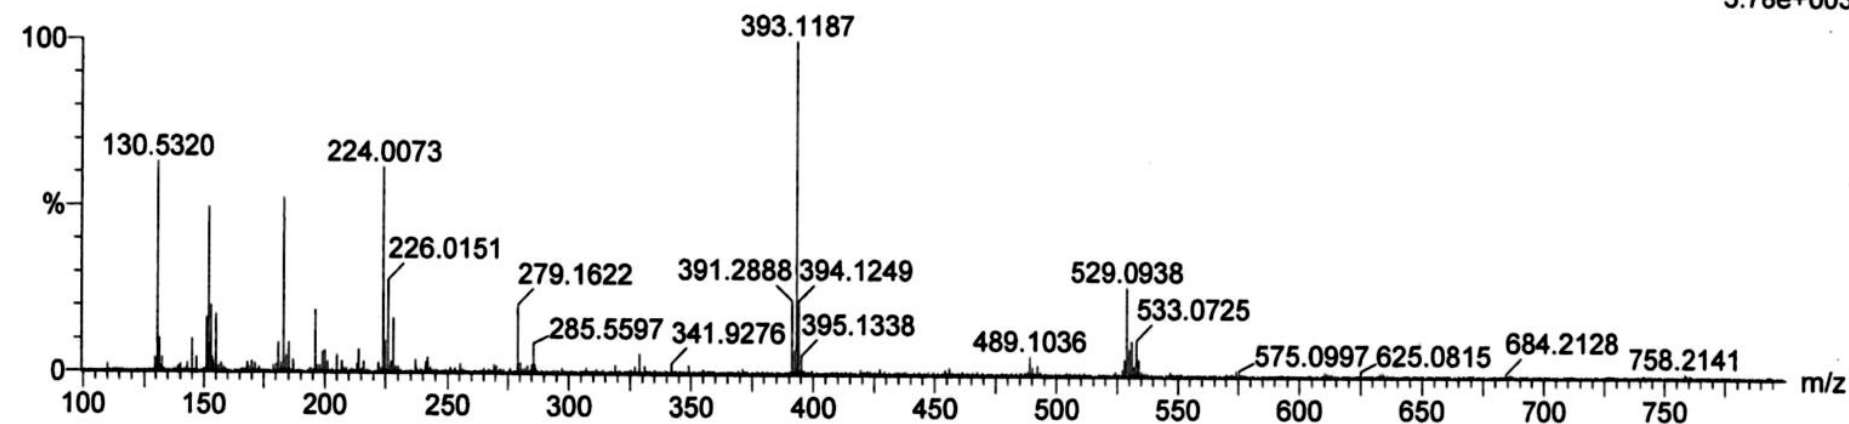

Minimum: -1.5  
Maximum: 100.0 5.0 50.0

| Mass     | Calc. Mass | mDa  | PPM  | DBE  | i-FIT | i-FIT (Norm) | Formula |     |    |    |
|----------|------------|------|------|------|-------|--------------|---------|-----|----|----|
| 393.1187 | 393.1186   | 0.1  | 0.3  | 9.5  | 76.5  | 0.2          | C19     | H21 | O9 |    |
|          | 393.1199   | -1.2 | -3.1 | 14.5 | 78.1  | 1.7          | C20     | H17 | N4 | O5 |

Figure S1. High-resolution (HR)-ESI-TOFMS spectrum of CTN-KA adduct (positive ion mode).

# Single Mass Analysis

Tolerance = 10.0 PPM / DBE: min = -1.5, max = 50.0

Element prediction: Off

Number of isotope peaks used for i-FIT = 3

Monoisotopic Mass, Even Electron Ions

199 formula(e) evaluated with 3 results within limits (up to 50 best isotopic matches for each mass)

Elements Used:

C: 1-30 H: 1-40 N: 0-5 O: 1-10

120315004 64 (1.952)

2: TOF MS ES-

5.21e+003

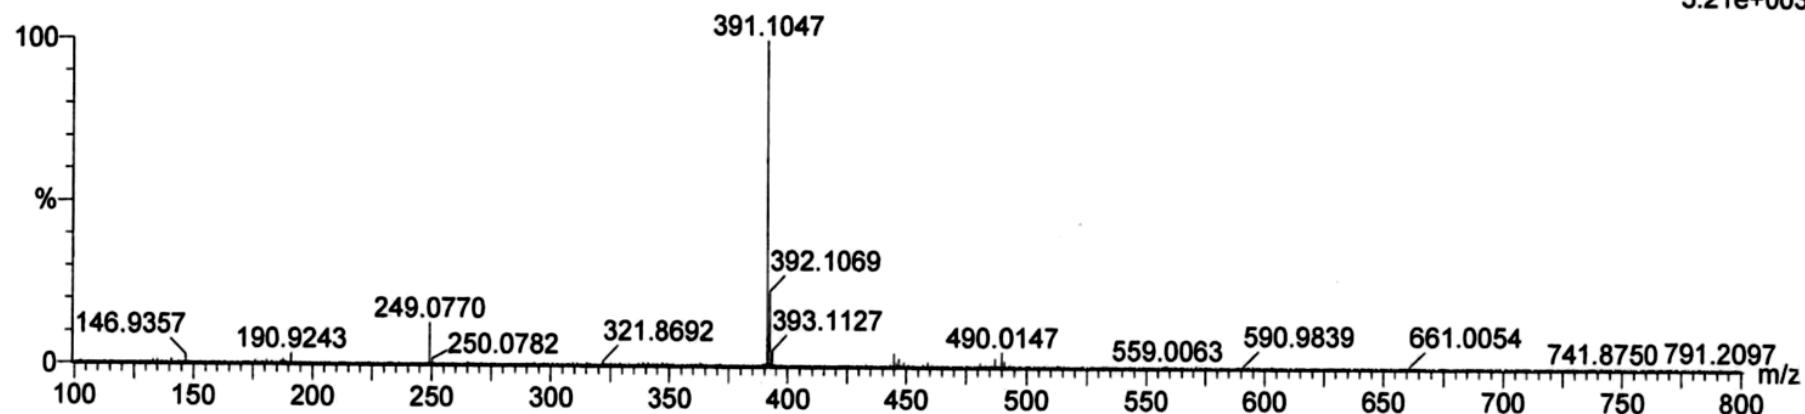

Minimum: -1.5  
Maximum: 100.0 10.0 50.0

| Mass     | Calc. Mass | mDa  | PPM  | DBE  | i-FIT | i-FIT (Norm) | Formula       |
|----------|------------|------|------|------|-------|--------------|---------------|
| 391.1047 | 391.1029   | 1.8  | 4.6  | 10.5 | 64.1  | 0.6          | C19 H19 O9    |
|          | 391.1042   | 0.5  | 1.3  | 15.5 | 64.4  | 0.9          | C20 H15 N4 O5 |
|          | 391.1083   | -3.6 | -9.2 | 19.5 | 70.3  | 6.7          | C25 H15 N2 O3 |

Figure S2. High-resolution (HR)-ESI-TOFMS spectrum of CTN-KA adduct (negative ion mode).

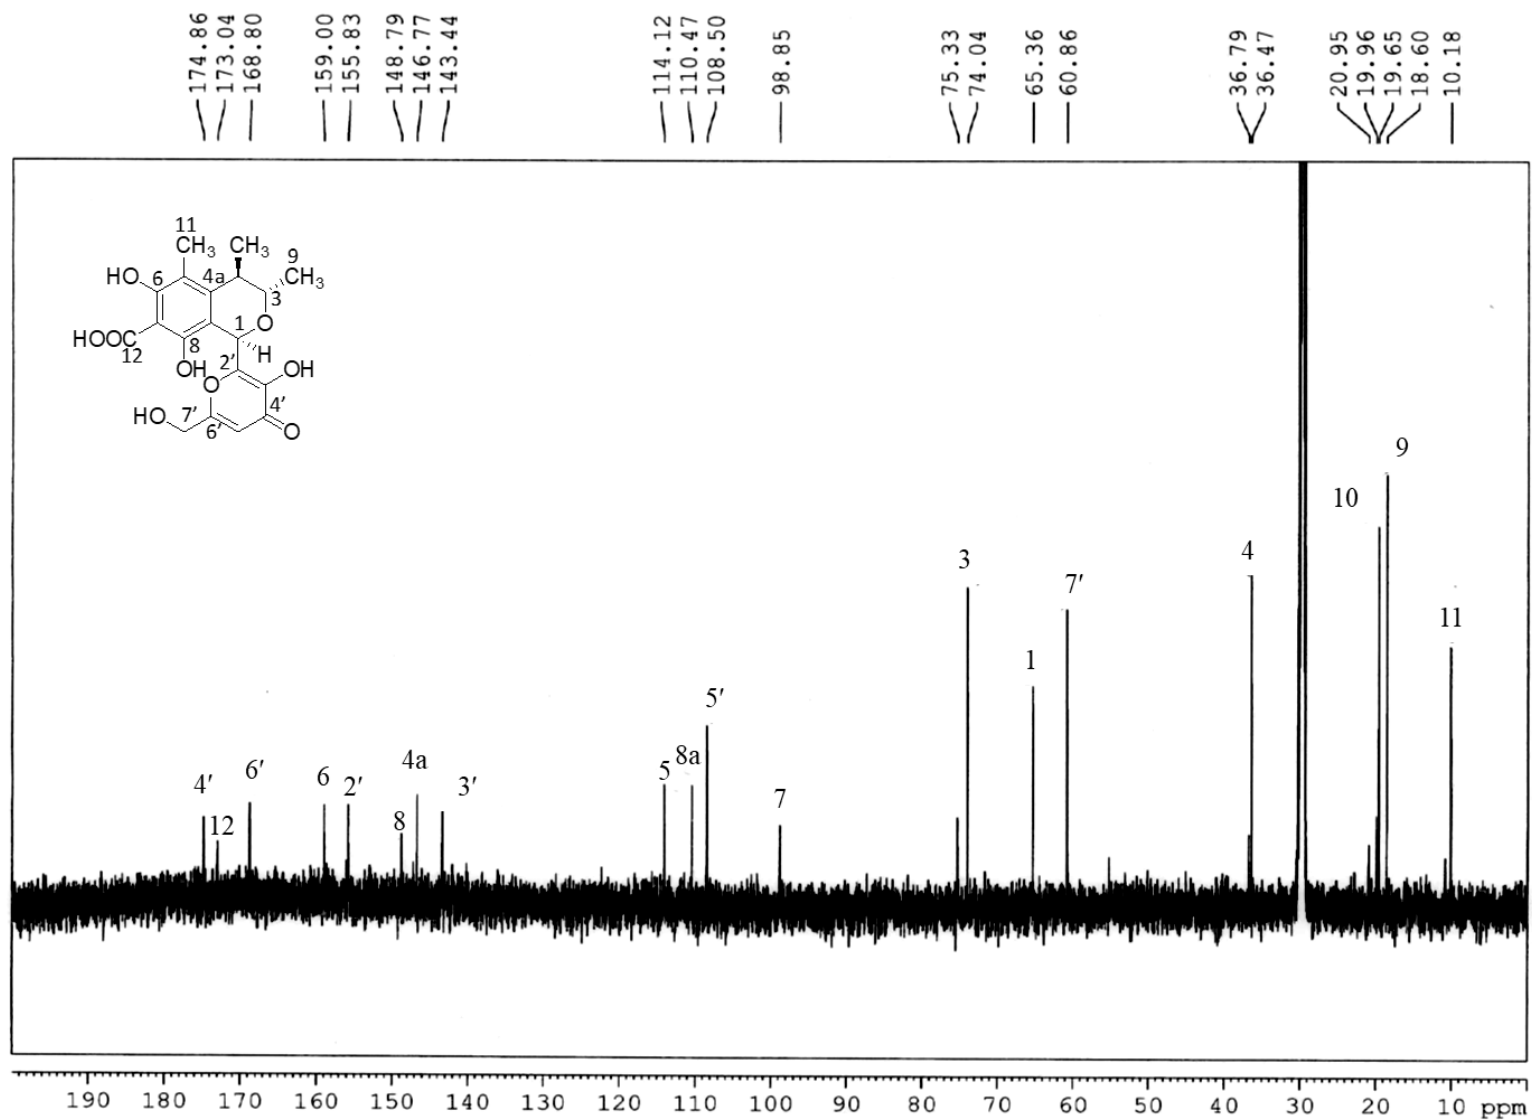

Figure S3.  $^{13}\text{C}$ -NMR spectrum of CTN-KA adduct ( $\text{Acetone-}d_6$ ).

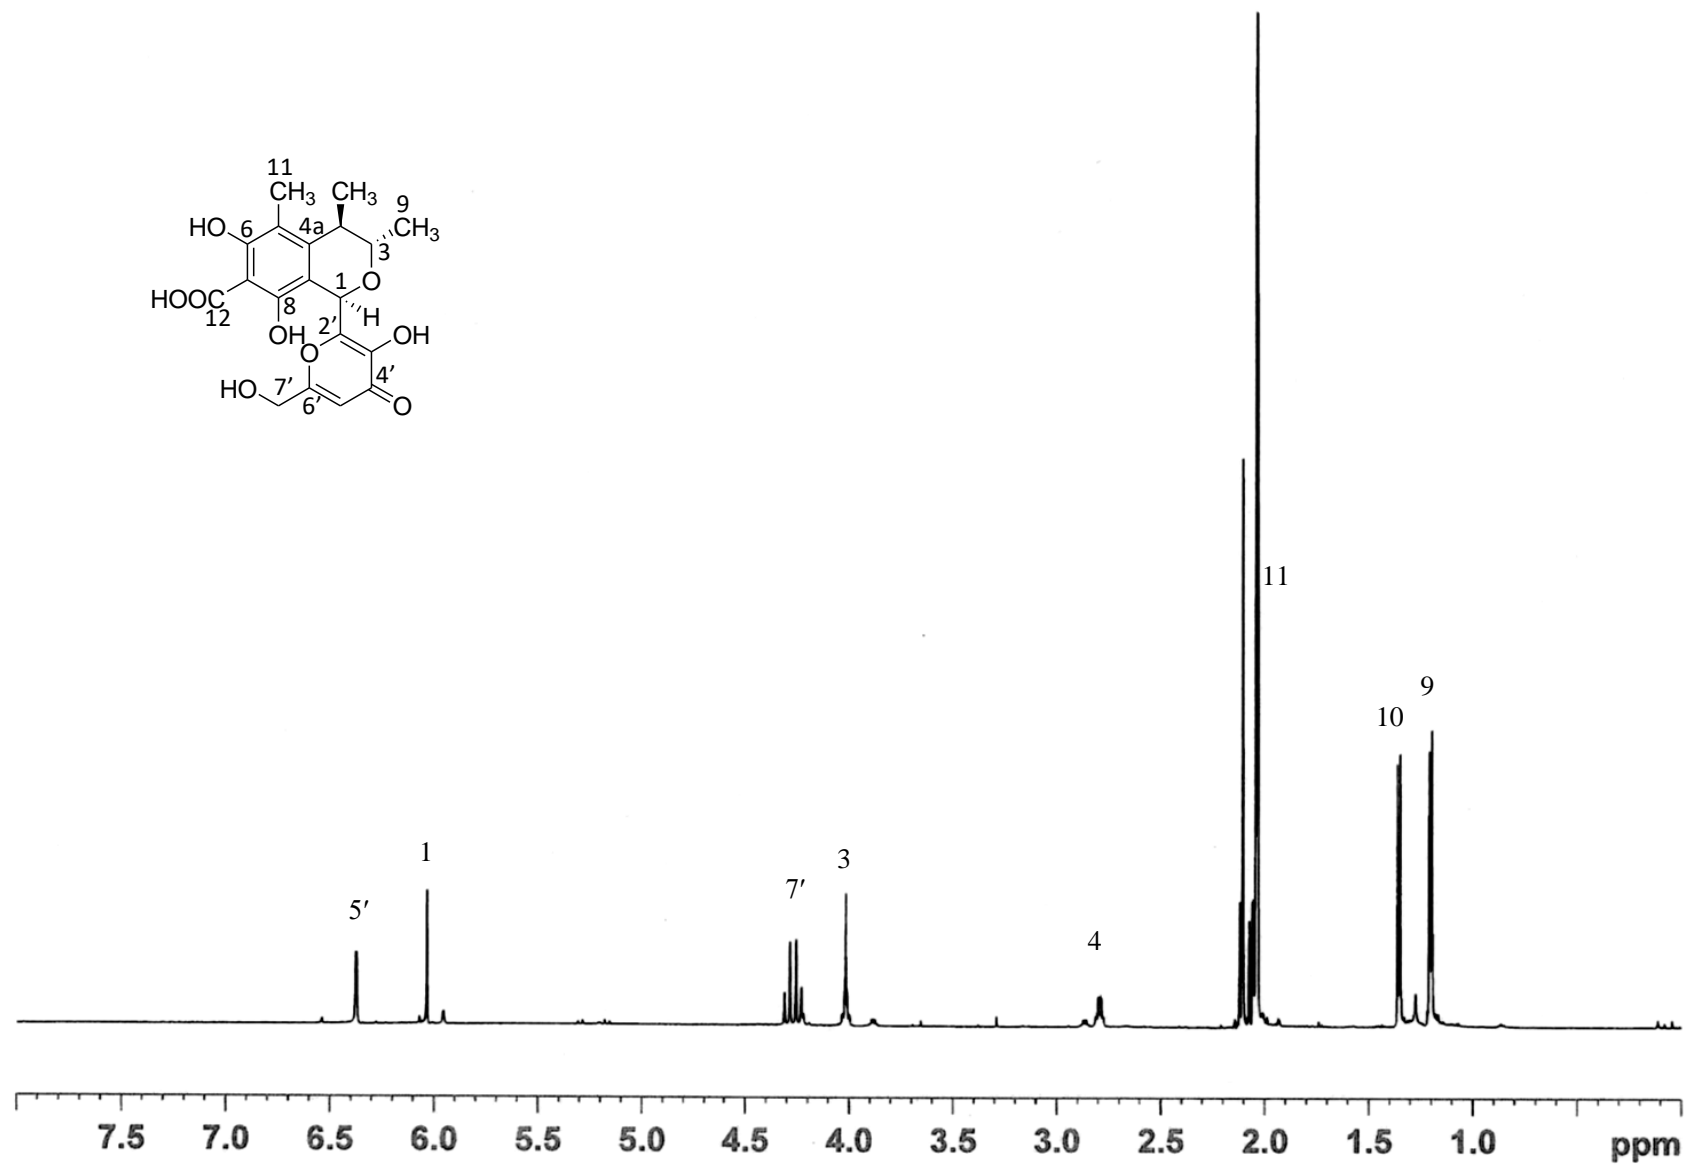

Figure S4.  $^1\text{H}$ -NMR spectrum of CTN-KA adduct ( $\text{Acetone-}d_6$ ).

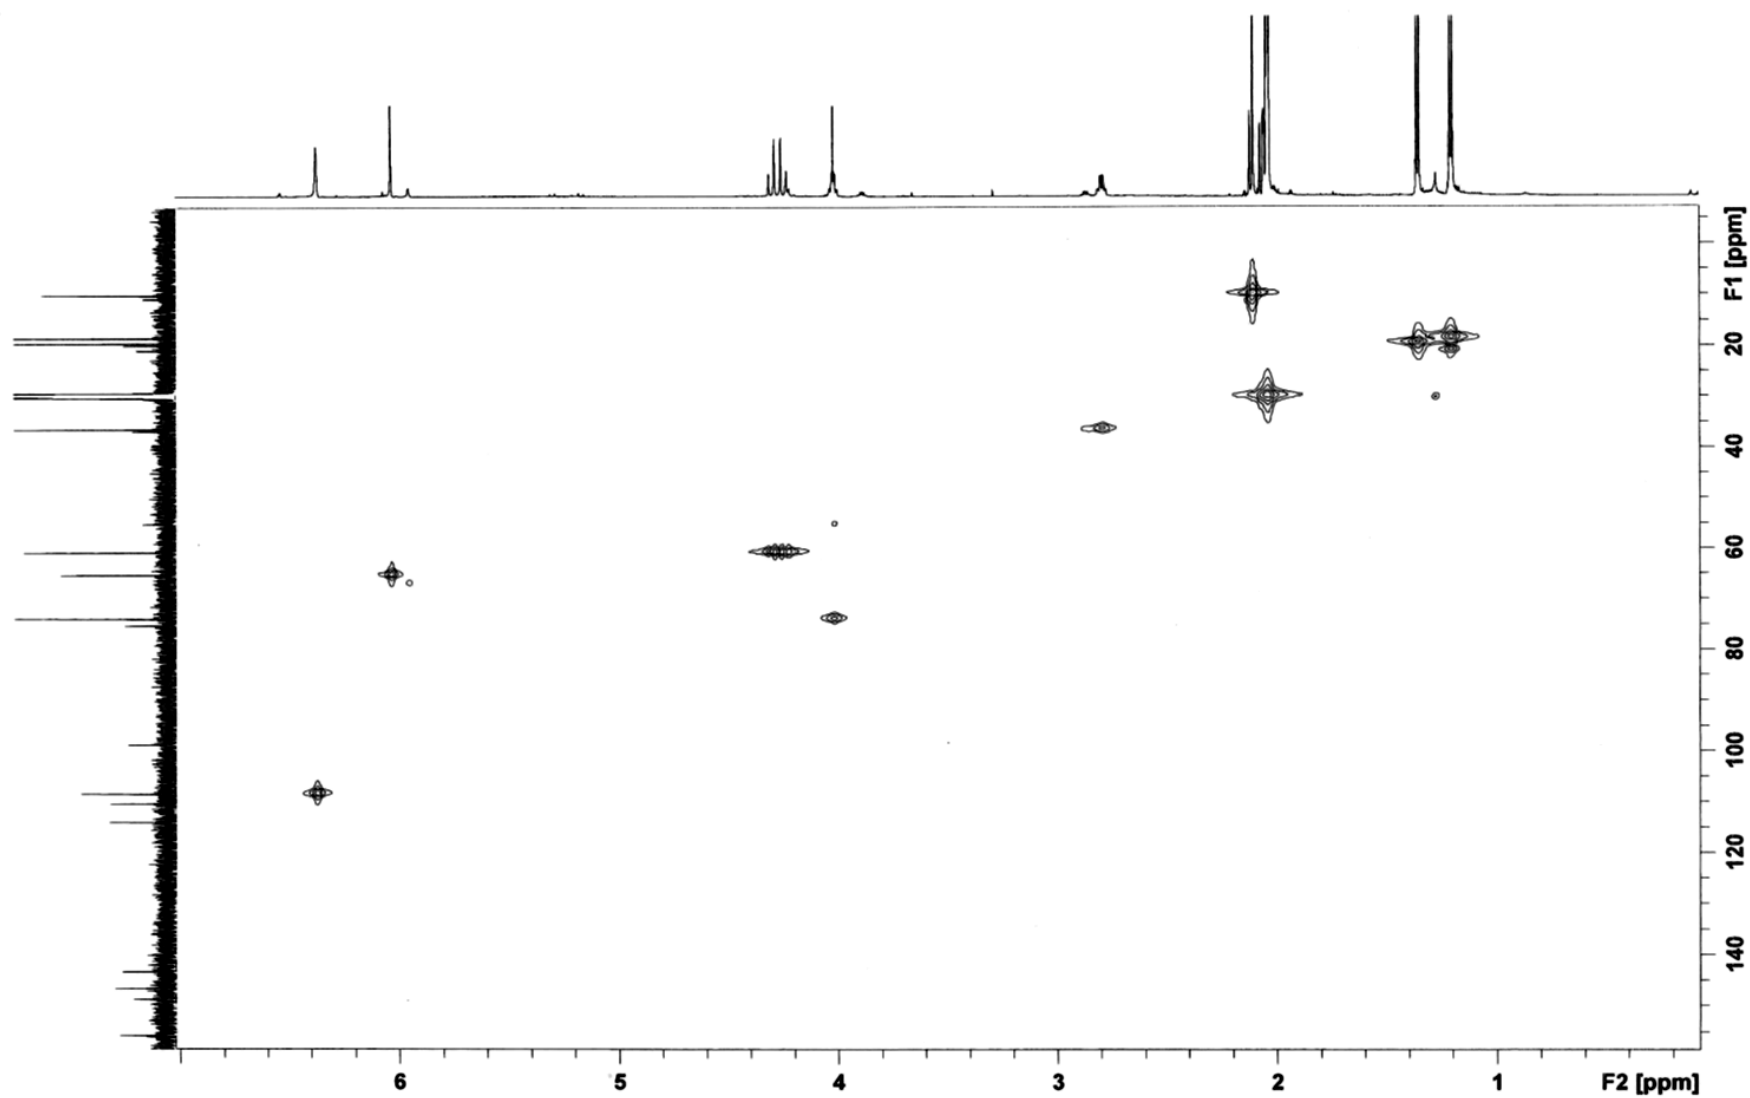

Figure S5. HMQC spectrum of CTN-KA adduct ( $\text{Acetone-}d_6$ ).

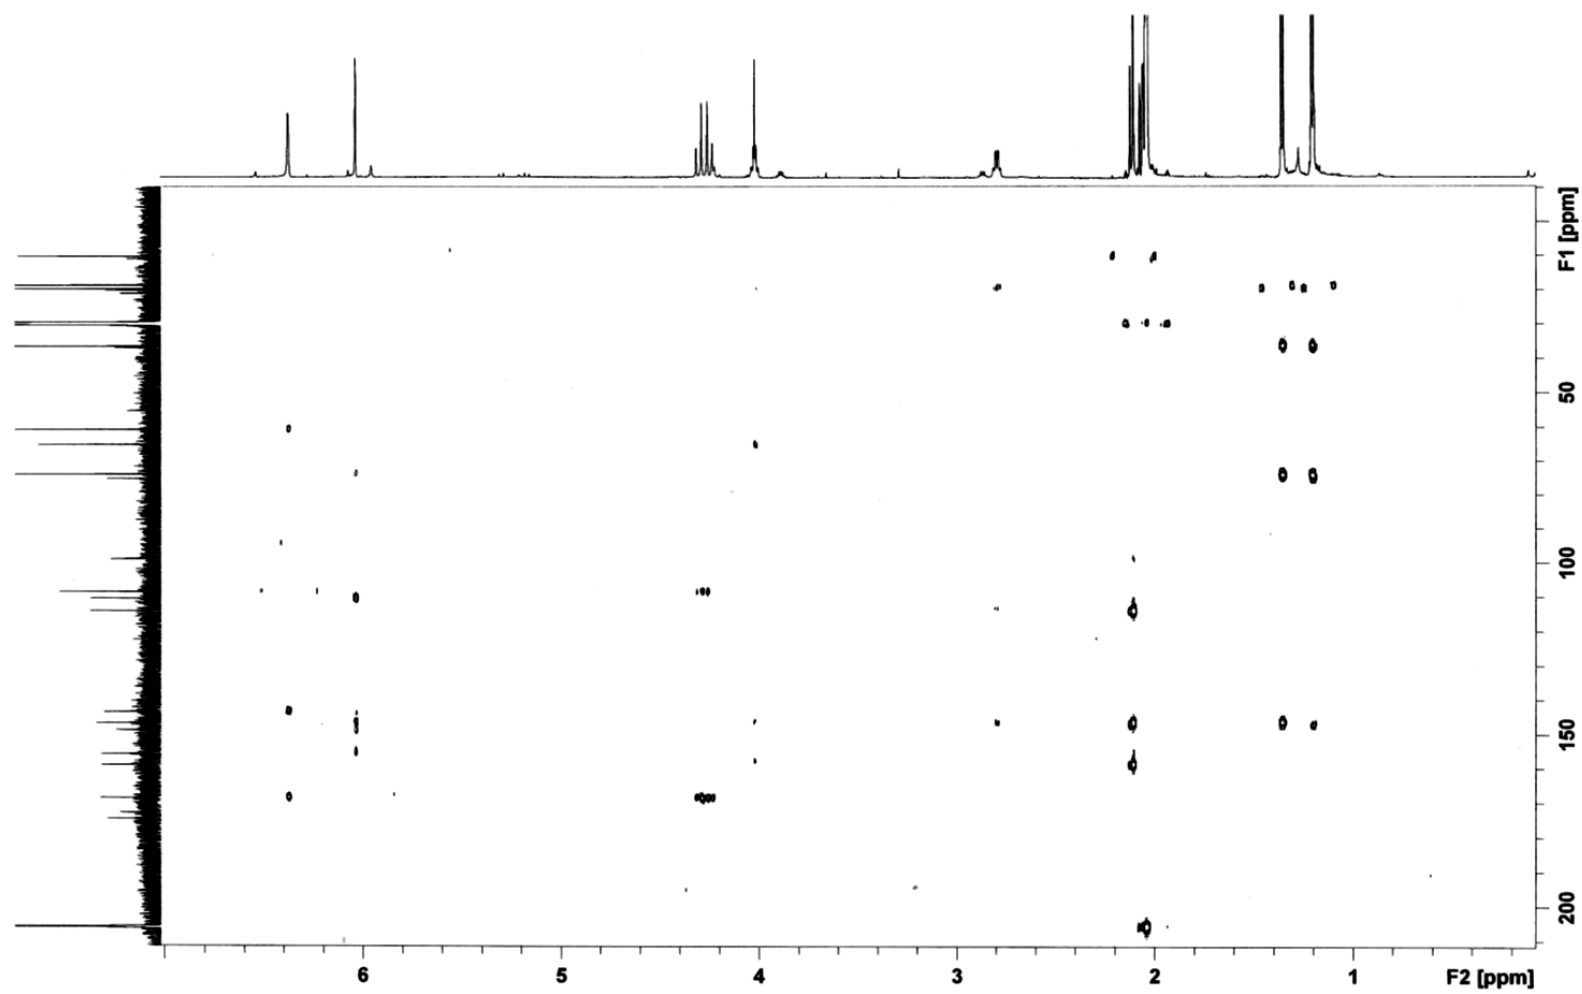

Figure S6. HMBC spectrum of CTN-KA adduct (Acetone- $d_6$ ).

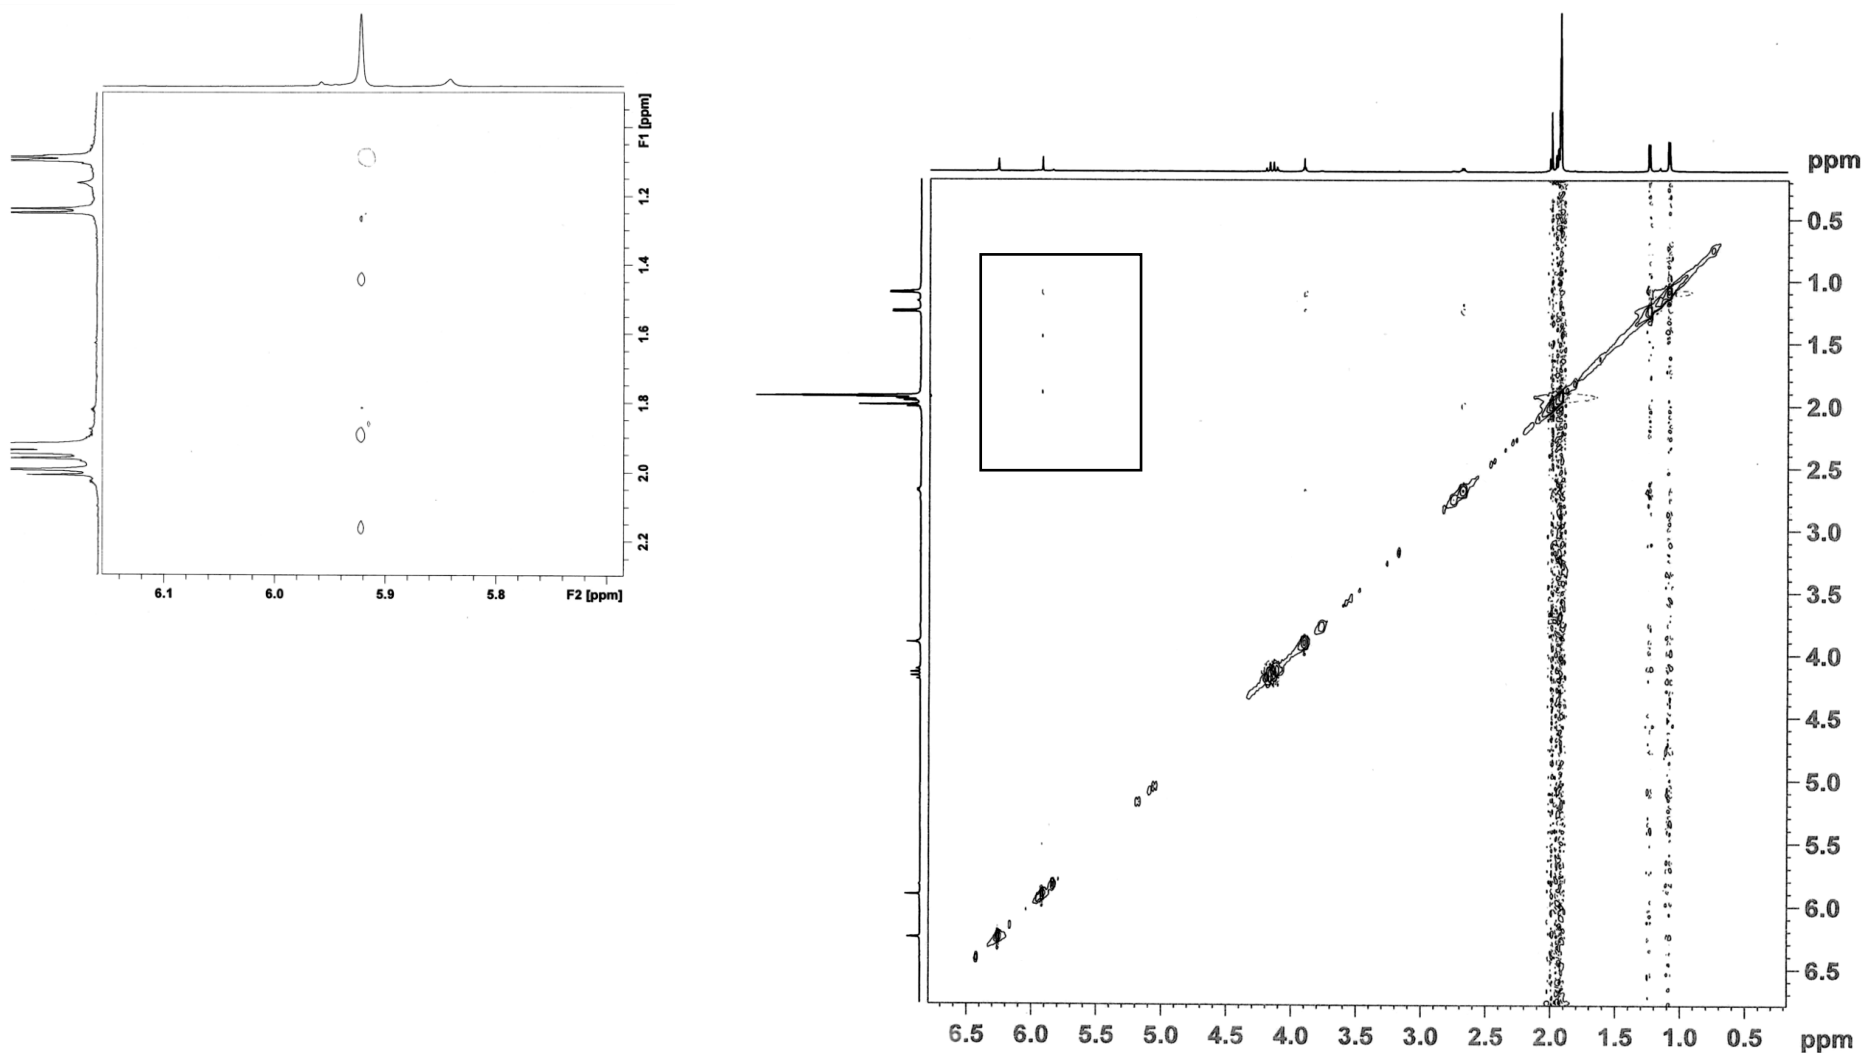

Figure S7. NOESY spectrum of CTN-KA adduct (Acetone- $d_6$ ).
